# Supplementary material for: Ammonium Uptake by Phytoplankton Regulates Nitrification in the Sunlit Ocean
Source: PubMed Central journal article supplement (PMC4177112; doi:10.1371/journal.pone.0108173), 2014-09-24
Supplement: pone.0108173.s002.pdf [file pone.0108173.s002.pdf]

1 **Supporting Information:**

2 **Table S1.** Phytoplankton community structure assessed by epifluorescence microscopy and  
3 expressed as percent of total phytoplankton biomass, in surface waters (2 m) at the time of  
4 sampling MBTS stations M1 and M2 in September 2011.

5

6

| Phytoplankton Group          | M1    | M2    |
|------------------------------|-------|-------|
| <i>Synechococcus</i>         | 6.4%  | 19.1% |
| Red Fluorescing Picoplankton | 1.7%  | 11.1% |
| Prymnesiophyte               | 6.4%  | 5.5%  |
| Autotrophic Flagellate       | 0.6%  | 0.0%  |
| Autotrophic Dinoflagellate   | 26.7% | 16.3% |
| Cryptophyte                  | 5.9%  | 4.1%  |
| Prasinophyte                 | 0.6%  | 0.2%  |
| Phaeophyte                   | 2.4%  | 0.0%  |
| Pennate Diatoms              | 7.7%  | 2.5%  |
| Centric Diatoms              | 41.6% | 41.2% |

7

8

9

10

11

12

13

14

15

16

17

18

19

20

21

22
