# Supplementary material for: Ammonium Uptake by Phytoplankton Regulates Nitrification in the Sunlit Ocean
Source: PubMed Central journal article supplement (PMC4177112; doi:10.1371/journal.pone.0108173), 2014-09-24
Supplement: pone.0108173.s003.pdf [file pone.0108173.s003.pdf]

Table S2. Abundance of AOA and AOB *amoA* and Thaumarchaeal 16S ribosomal RNA genes and transcripts at the start and end of multiday experiments.

| Day                  | WCB <i>amoA</i> genes L <sup>-1</sup> |                                         | WCB <i>amoA</i> mRNA L <sup>-1</sup> |    | $\beta$ -AOB <i>amoA</i> genes L <sup>-1</sup> |                                         | $\beta$ -AOB <i>amoA</i> mRNA L <sup>-1</sup> |    | MG1 16S genes L <sup>-1</sup> |                                         | MG1 16S transcripts L <sup>-1</sup> |                                         | WCA <i>amoA</i> genes L <sup>-1</sup> |                                         | WCA <i>amoA</i> mRNA L <sup>-1</sup> |                                         |
|----------------------|---------------------------------------|-----------------------------------------|--------------------------------------|----|------------------------------------------------|-----------------------------------------|-----------------------------------------------|----|-------------------------------|-----------------------------------------|-------------------------------------|-----------------------------------------|---------------------------------------|-----------------------------------------|--------------------------------------|-----------------------------------------|
|                      | 0                                     | 3                                       | 0                                    | 3  | 0                                              | 3                                       | 0                                             | 3  | 0                             | 3                                       | 0                                   | 3                                       | 0                                     | 3                                       | 0                                    | 3                                       |
| Surface <sup>†</sup> | 4x10 <sup>3</sup>                     | 1x10 <sup>2</sup><br>±2x10 <sup>1</sup> | BD                                   | BD | 2x10 <sup>4</sup>                              | 9x10 <sup>3</sup><br>±2x10 <sup>3</sup> | BD                                            | BD | 3x10 <sup>5</sup>             | 1x10 <sup>5</sup><br>±1x10 <sup>4</sup> | 2x10 <sup>4</sup>                   | 9x10 <sup>2</sup><br>±3x10 <sup>2</sup> | 7x10 <sup>5</sup>                     | 2x10 <sup>5</sup><br>±9x10 <sup>4</sup> | 3x10 <sup>3</sup>                    | 5x10 <sup>2</sup><br>±2x10 <sup>2</sup> |
| Deep                 | 2x10 <sup>5</sup>                     | 1x10 <sup>5</sup><br>±4x10 <sup>4</sup> | 4x10 <sup>3</sup>                    | BD | 3x10 <sup>5</sup>                              | 2x10 <sup>5</sup><br>±3x10 <sup>4</sup> | 5x10 <sup>3</sup>                             | BD | 5x10 <sup>6</sup>             | 3x10 <sup>6</sup><br>±7x10 <sup>5</sup> | 8x10 <sup>6</sup>                   | 3x10 <sup>6</sup><br>±1x10 <sup>6</sup> | 4x10 <sup>6</sup>                     | 4x10 <sup>6</sup><br>±3x10 <sup>5</sup> | 4x10 <sup>5</sup>                    | 7x10 <sup>4</sup><br>±2x10 <sup>4</sup> |
| Bloom                | 2x10 <sup>5</sup>                     | 2x10 <sup>4</sup><br>±1x10 <sup>3</sup> | 7x10 <sup>3</sup>                    | BD | 4x10 <sup>5</sup>                              | 7x10 <sup>4</sup><br>±2x10 <sup>4</sup> | 7x10 <sup>3</sup>                             | BD | 4x10 <sup>6</sup>             | 2x10 <sup>6</sup><br>±3x10 <sup>5</sup> | 6x10 <sup>6</sup>                   | 2x10 <sup>5</sup><br>±2x10 <sup>4</sup> | 4x10 <sup>6</sup>                     | 2x10 <sup>6</sup><br>±2x10 <sup>5</sup> | 5x10 <sup>6</sup>                    | 1x10 <sup>4</sup><br>±4x10 <sup>1</sup> |

<sup>†</sup>Values represent the average of replicate samples (N=3 for 'surface', 'bloom'; N=2 for 'deep') for end point samples (± S.D). Initial time point samples were not replicated. BD, below detection limit of assay (1 copy per qPCR reaction for WCA, WCB; 10 copies per reaction for AOB).
